# Supplementary material for: CALR-Regulated Lactylation Modifications in Periodontitis: Insights from Bulk and Single-Cell RNA Sequencing
Source: Research Square preprint supplement (doi:10.21203/rs.3.rs-7867472/v1), 2026-02-22
Supplement: Supplementary file 2 [file 4d8f9de8bf71253795ff3a53.docx]

**Supplementary figure legends**

**Sup.1. Single-cell RNA-Seq analysis of protein lactylation modifications in gingival tissue during periodontitis.**

(A) Single-cell RNA sequence analysis Clustered tree diagram of unit grouping at different resolutions; (B) The cells were divided into 14 independent clusters by UMAP; (C)Number of cells in each cluster and (D) each cluster differentially expressed genes (top5); (E) Each cell type was scored according to the HALLMARK pathway, and the heatmap showed the HALLMARK score of each cell; (F) The GSVA R package was used to score lactylation modifications in each cell, and the correlation between lactylation scores and HALLMARK pathway scores was calculated.

**Sup.2. Integration of gene expression datasets (GSE173037 and GSE16134) via merging, batch correction ("limma" and "sva"), and normalization ("preprocessCore") to prioritize biological variation.**

1. Pre-merge PCA: GSE173037 (12 disease/12 healthy) and GSE16134 (241 disease/69 healthy); (B)Post-merge PCA (17,506 genes, 334 samples) with reduced batch effects ("FactoMineR" and "factoextra")；(C)Pre-normalization outliers (range: -300–400)；(D)Post-normalization tightened distribution (biologically plausible range).

**Sup.3. Single-cell data were integrated and processed via quality filtering , batch correction (harmony), normalization (Seurat), and clustering to prioritize biological variation.**

(A-B) **Gene/RNA count quality control:**(A)Pre-filtering distribution (raw data); (B)Post-filtering (retained: 70,987 cells, 21,935 genes); (C-D)**Gene expression proportion quality control:**(C) Pre-filtering outliers (percent.mito ≥15%, percent.ribo ≤3%, percent.hb ≥0.1%)；(D) Post-filtering tightened distribution (percent.mito <15%, percent.ribo >3%, percent.hb <0.1%).
