# Supplementary material for: CALR-Regulated Lactylation Modifications in Periodontitis: Insights from Bulk and Single-Cell RNA Sequencing
Source: Research Square preprint supplement (doi:10.21203/rs.3.rs-7867472/v1), 2026-02-22
Supplement: Supplementary file 2 [file dc651661a70973cb6b8656ba.docx]

**Supplementary Table 1.** The primer sequences of human for RT-qPCR.

| Gene (murine) | Forward primer (5’-3’) | Reverse primer (5’-3’) |
| --- | --- | --- |
| IL-1β | ATGATGGCTTATTACAGTGGCAA | GTCGGAGATTCGTAGCTGGA |
| IL-6 | TCCAGTTGCCTTCTTGGGAC | GAAAGACGGCACACCCACCCT |
| TNF-α | CAAGGACAGCAGAGGACCAG | TCCTTTCCAGGGGAGAGAGG |
| β-actin | CCACCATGTACCCTGGCATT | CGGACTCGTCATACTCCTGC |
| BTF3 | TGCTCGCAGAAAGAAGAAGGT | ATGGTGAAAGTGTTCGCTGC |
| MSN | TGGATGCCTTGGGTCTCAAC | CGCTTGTTAATCCGAAGCCG |
| PPP1CB | CGAGTTTGATAATGCTGGTGGAATG | GCTGTTCGAGTTGGAGTGAC |
| SOD1 | GAGCAGAAGGAAAGTAATGG | TACACCACAAGCCAAACGAC |
| CALM1 | TCACTGGGTCAGAACCCAACAGAA | AAAGACTCGGAATGCCTCACGGAT |
| HMGN3 | GAGCCCACAAGACGGTCTG | TCTTCCCTTTAGCACCTCTGC |
| PCNP | TTTGCCATAGGTAGTCAGACGA | GCTGCTGCTACTGAAAGAGTTT |
| FABP5 | CAGATGGTGCATTGGTTCAGC | CCTTCCCATCACACTCCACC |
| CALR | AGTTCCGGCAAGTTCTACGG | CCACAGATGTCGGGACCAAA |

**Supplementary Table 2.** The primer sequences of mouse for RT-qPCR.

| Gene (murine) | Forward primer (5’-3’) | Reverse primer (5’-3’) |
| --- | --- | --- |
| IL-18 | CCTTTGAGGCATCCAGGACA | CACACCACAGGGGAGAAGTG |
| TNF-α | AGGCACTCCCCCAAAAGATG | CCACTTGGTGGTTTGTGAGTG |
| β-actin | AGGGCTATGCTCTCCCTCAC | CTCTCAGCTGTGGTGGTGAA |
| CALR | AAGGAGCAGTTTCTGGACGG | GCCGACAGAGCATAAAAGCG |
